# Supplementary material
Source: MDPI journal article supplement (https://www.mdpi.com/2073-4468/11/1/15)
Supplement: s1 [file s1]

|                                |         | N  | PDL1+CD20+                   | P-value  | PD1+CD20+                      | P-value |
|--------------------------------|---------|----|------------------------------|----------|--------------------------------|---------|
| <b>Ann Arbor Stage</b>         | I       | 4  | 13.5 <sup>a</sup><br>(12-15) | 0.001*   | 7.5 <sup>a</sup><br>(7-8)      | 0.003*  |
|                                | II      | 5  | 15 <sup>a</sup><br>(10.5-15) |          | 8 <sup>a</sup><br>(7-9.5)      |         |
|                                | III     | 5  | 16<br>(16-17)                |          | 9<br>(8.5-10.5)                |         |
|                                | IV      | 6  | 24 <sup>b</sup><br>(23-25)   |          | 11.5 <sup>b</sup><br>(10.8-12) |         |
| <b>B symptoms</b>              | -Ve     | 8  | 13.5<br>(11.3-15)            | <0.001** | 7.5<br>(7-8)                   | 0.001*  |
|                                | +Ve     | 12 | 18.5<br>(16-24)              |          | 10.5<br>(9.3-11.8)             |         |
| <b>Bone marrow involvement</b> | -Ve     | 13 | 15<br>(12-16)                | <0.001** | 8<br>(7-9)                     | 0.001*  |
|                                | +Ve     | 7  | 24<br>(20-25)                |          | 11<br>(10-12)                  |         |
| <b>Extranodal involvement</b>  | -Ve     | 3  | 15<br>(15- )                 | 0.830    | 8<br>(8- )                     | 0.957   |
|                                | +Ve     | 17 | 16<br>(13.5-22)              |          | 9<br>(7.5-11)                  |         |
| <b>DLBCL Type</b>              | Non-GCB | 9  | 24<br>(16.5-24.5)            | <0.001** | 11<br>(9-12)                   | 0.009*  |
|                                | GCB     | 11 | 15<br>(12-15)                |          | 8<br>(7-10)                    |         |
| <b>Age</b>                     | <60     | 15 | 16<br>(12-20)                | 0.310    | 9<br>(7-11)                    | 0.595   |
|                                | ≥60     | 5  | 17<br>(15-24.5)              |          | 10<br>(8.5-10.5)               |         |
|                                | +Ve     | 12 | 16.5<br>(15-24)              |          | 10<br>(7.3-11)                 |         |
| <b>ECOG performance</b>        | I       | 9  | 15 <sup>a</sup><br>(12-15)   | 0.003*   | 8 <sup>a</sup><br>(7-9)        | 0.009*  |
|                                | II      | 6  | 16.5<br>(14.5-9)             |          | 9.5<br>(7.8-11.3)              |         |
|                                | III     | 5  | 24 <sup>b</sup><br>(22-24.5) |          | 11 <sup>b</sup><br>(10.5-12)   |         |

**Supplementary Table S1.** Association of PD-L1+CD20+ % and PD-1+CD20+ % with the clinicopathological characteristics of newly diagnosed patients with DLBCL. GCB: germinal center B-cell; N: Number; ECOG: Eastern Cooperative Oncology Group. Mann Whitney test was used to compare the differences between the two groups. Kruskal Wallis test was used to compare the difference between more than 2 groups followed by pairwise comparisons between every two groups using Bonferroni correction. \* Significant difference at p-value < 0.05. High significant differences are identified with asterisks (\*\*) (p< 0.001). Superscripts with different small letters refer to the significant difference between every two groups at a p-value < 0.05.

|                         |         | N  | PDL1+CD20+                  | P-value | PD1+CD20+        | P-value |
|-------------------------|---------|----|-----------------------------|---------|------------------|---------|
| <b>Ann Arbor Stage</b>  | I       | 4  | 6 <sup>b</sup><br>(5.6-6)   | 0.001*  | 0.7<br>(0.7-0.9) | 0.591   |
|                         | II      | 8  | 6.5<br>(6-6.9)              |         | 0.9<br>(0.5-1)   |         |
|                         | III     | 5  | 7.5 <sup>a</sup><br>(7-8.3) |         | 0.7<br>(0.5-1.1) |         |
|                         | IV      | 3  | 9 <sup>a</sup><br>(8- )     |         | 1<br>(1-1)       |         |
| <b>DLBCL Type</b>       | Non-GBC | 6  | 7.8<br>(6.8-8.7)            | 0.049*  | 1<br>(0.5-1.1)   | 0.667   |
|                         | GBC     | 14 | 6.5<br>(6-7)                |         | 0.8<br>(0.6-1)   |         |
| <b>Age</b>              | <60     | 17 | 7<br>(6-7.8)                | 0.748   | 1<br>(0.6-1)     | 0.620   |
|                         | ≥60     | 3  | 6.6<br>(6- )                |         | 0.8<br>(0.5- )   |         |
|                         | +Ve     | 5  | 8<br>(5.8-8.8)              |         | 1<br>(0.6-1.1)   |         |
| <b>ECOG performance</b> | I       | 16 | 6.8<br>(6-8)                | 0.473   | 1<br>(0.7-1)     | 0.140   |
|                         | II      | 4  | 6.5<br>(5.9-7.4)            |         | 0.6<br>(0.5-0.9) |         |

**Supplementary Table S2.** Association of PD-L1+CD20+ % and PD-1+CD20+ % with the clinicopathological characteristics of post-therapy DLBCL patients. N: Number; ECOG: Eastern Cooperative Oncology Group; GCB: germinal center B-cell. Mann Whitney test was used to compare the differences between the two groups. Kruskal Wallis test was used to compare the difference between more than 2 groups followed by pairwise comparisons between every two groups using Bonferroni correction. \* Significant difference at p-value < 0.05. High significant differences are identified with asterisks (\*\*) (p< 0.001). Superscripts with different small letters refer to the significant difference between every two groups at a p-value < 0.05.
